# Supplementary material for: Sodium and Potassium Intake, Knowledge Attitudes and Behaviour Towards Salt Consumption Amongst Adults in Podgorica, Montenegro
Source: PubMed Central journal article supplement (PMC6356471; doi:10.3390/nu11010160), 2019-01-13
Supplement: nutrients-11-00160-s001.pdf [file nutrients-11-00160-s001.pdf]

**Table S1. Supplemental Table 1.**

| Variable                    | All<br>( <i>n</i> = 639) | Excluded*<br>( <i>n</i> = 351) | <i>p</i> -value |
|-----------------------------|--------------------------|--------------------------------|-----------------|
| Age (yrs)                   | 46.8 (11.3)              | 44.8 (11.2)                    | 0.008           |
| Height (cm)                 | 175.4 (9.2)              | 175.8 (9.4)                    | 0.5             |
| Weight (kg)                 | 79.8 (16.8)              | 80.4 (17.3)                    | 0.6             |
| B.M.I. (kg/m <sup>2</sup> ) | 25.8 (4.2)               | 25.8 (4.6)                     | 1.0             |
| Systolic BP (mmHg)          | 125.1 (16.2)             | 127.0 (15.4)                   | 0.08            |
| Diastolic BP (mmHg)         | 79.1 (9.2)               | 80.2 (9.0)                     | 0.07            |
| Pulse rate (b/min)          | 72.4 (8.7)               | 73.8 (10.0)                    | 0.02            |

\* Participants without complete urines (see Figure 2)

**Table S2. Daily urinary excretions of volume, sodium, potassium and creatinine by age (*n* = 639).**

|                          | I ( <i>n</i> = 118) | II ( <i>n</i> = 239) | III ( <i>n</i> = 282) |
|--------------------------|---------------------|----------------------|-----------------------|
| Volume (mL/24 hour)      | 1465 (535)          | 1560 (576)           | 1755 (638) *          |
| Sodium (mmol/24 hour)    | 181.0 (78.9)        | 189.5 (96.8)         | 186.2 (89.3)          |
| Potassium (mmol/24 hour) | 59.6 (23.2)         | 63.1 (26.0)          | 63.1 (27.4)           |
| Creatinine (g/24 hour)   | 1.48 (0.60)         | 1.47 (0.57)          | 1.33 (0.51) *         |

Results are mean (SD); \* *p* for trend: *p* < 0.01.

**Table S3. Estimates of salt and potassium intake by age (*n* = 369).**

|                          | I ( <i>n</i> = 118) | II ( <i>n</i> = 239) | III ( <i>n</i> = 282) |
|--------------------------|---------------------|----------------------|-----------------------|
| Salt intake (g/day)      | 11.3 (4.9)          | 11.8 (6.0)           | 11.6 (5.6)            |
| Potassium intake (g/day) | 3.0 (1.2)           | 3.2 (1.3)            | 3.2 (1.4)             |

Results are mean (SD).

**Table S4. Knowledge, attitudes and behaviours towards salt consumption by age.**

| Question                                                                               | I ( <i>n</i> = 107) | II ( <i>n</i> = 224) | III ( <i>n</i> = 268) |
|----------------------------------------------------------------------------------------|---------------------|----------------------|-----------------------|
| Do you add salt to food at the table?<br>(Often/Always) (%)                            | 76.1                | 73.5                 | 73.1                  |
| In the food you eat at home salt is added in cookin<br>(Often/Always) (%)              | 24.8                | 23.9                 | 17.9                  |
| How much salt do you think you consume?<br>(Too much) (%)                              | 36.8                | 39.1                 | 32.1                  |
| Do you think that a high salt diet could cause a<br>serious health problem? (Yes) (%)  | 83.8                | 85.7                 | 86.8                  |
| How important is lowering salt/sodium in your diet?<br>(Very important) (%)            | 41.4                | 41.6                 | 47.5                  |
| Do you do anything on a regular basis to control<br>your salt/sodium intake? (Yes) (%) | 30.2                | 33.5                 | 36.8                  |

**Supplemental Table S5.** Daily urinary excretions of sodium and potassium by education ( $n = 622$ ).

|                          | <b>Low ( up to Secondary school)</b><br>$n = 158$ | <b>Medium (High school)</b><br>$n = 237$ | <b>High (University degree)</b><br>$n = 227$ |
|--------------------------|---------------------------------------------------|------------------------------------------|----------------------------------------------|
| Sodium (mmol/24 hour)    | 190.9 (93.3)                                      | 199.4 (90.0)                             | 171.0 (85.8) *                               |
| Potassium (mmol/24 hour) | 59.0 (25.0)                                       | 63.9 (26.7)                              | 63.9 (26.6)                                  |

\* $p = 0.002$  vs Medium**Supplemental Table S6.** Daily urinary excretions of sodium and potassium by work ( $n = 599$ ).

|                          | <b>Government employee</b><br>$n = 195$ | <b>Non-government employee</b><br>$n = 188$ | <b>Other *</b><br>$n = 95$ | <b>Retired</b><br>$n = 80$ | <b>Unemployed</b><br>$n = 41$ |
|--------------------------|-----------------------------------------|---------------------------------------------|----------------------------|----------------------------|-------------------------------|
| Sodium (mmol/24 hour)    | 178.3 (87.3)                            | 192.7 (87.5)                                | 165.6 (91.5)               | 193.3 (75.4)               | 216.1 (191.0) **              |
| Potassium (mmol/24 hour) | 61.4 (26.3)                             | 65.8 (26.9)                                 | 57.8 (27.8)                | 63.2 (25.9)                | 62.2 (25.4)                   |

\* Self-employees, Non-paid, Student, Homemaker; \*\* $p = 0.02$  vs Other
